# Supplementary material for: Dissociation of Implicit and Explicit Interpretation Bias: The Role of Depressive Symptoms and Negative Cognitive Schemata
Source: MDPI journal article supplement (doi:10.3390/brainsci13121620), 2023-11-22
Supplement: s1 [file s1]

**Table S1.** Detailed statistical indices of the variables excluded from the respective regression models during the stepwise hierarchical regression analysis predicting the mean bias score in the cue conditioning paradigm (N = 113) from trait and state affective variables.

|                | $\beta$ | T      | p (predictor) |
|----------------|---------|--------|---------------|
| <b>Model 1</b> |         |        |               |
| BDI            | .017    | .174   | .862          |
| PANAS Negativ  | -.116   | -1.188 | .238          |
| STAI-S         | -.003   | -.031  | .976          |
| DAS            | .083    | .853   | .395          |
| STAI-T         | -.072   | -.716  | .475          |
| Valence PR     | -.041   | -.431  | .680          |
| Valence NR     | .000    | -.005  | .996          |

**Abbreviations:**  $\beta$ , standardized beta coefficient

**Table S2.** Detailed statistical indices of the variables excluded from the respective regression models during the stepwise hierarchical regression analysis predicting the mean bias score in the DUCTUS paradigm (N = 113) from trait and state affective variables.

|                | $\beta$ | T      | p (predictor) |
|----------------|---------|--------|---------------|
| <b>Model 1</b> |         |        |               |
| WHO-5          | .370    | 4.014  | <.001         |
| PANAS Negativ  | -.084   | -.887  | .377          |
| DAS            | -.471   | -5.689 | <.001         |
| STAI-S         | -.255   | -2.694 | .008          |
| STAI-T         | -.315   | -3.370 | .001          |
| <b>Model 2</b> |         |        |               |
| WHO-5          | 2.82    | 3.370  | .001          |
| PANAS Negativ  | -0.41   | -.491  | .625          |
| STAI-S         | -.195   | -2.319 | .022          |
| STAI-T         | -.177   | -1.995 | .049          |
| <b>Model 3</b> |         |        |               |
| PANAS Negativ  | -.062   | -.780  | .438          |
| STAI-S         | -.129   | -1.534 | .128          |
| STAI-T         | -.052   | -.527  | .600          |

**Abbreviations:**  $\beta$ , standardized beta coefficient
